# Supplementary material
Source: HighWire-hosted journal article supplement (https://erj.ersjournals.com/content/55/4/2000764)
Supplement: inline-supplementary-material-1 [file inline-supplementary-material-1.pdf]

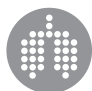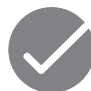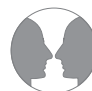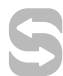

SHAREABLE PDF

# Urgent need of a management plan for survivors of COVID-19

Bartolome Celli <sup>1</sup> and Leonardo M. Fabbri <sup>2</sup>

**Affiliations:** <sup>1</sup>Pulmonary and Critical Care Division, Brigham and Women's Hospital, Wellesley, MA, USA.  
<sup>2</sup>University of Ferrara, Ferrara, Italy.

**Correspondence:** Leonardo M. Fabbri, Viale Giuseppe Verdi 59, 41121 Modena, Italy.  
E-mail: leonardo.fabbri20@gmail.com

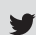

@ERSpublications

**Survivors of COVID-19 may be at increased risk of cardiovascular morbidity and mortality and should be carefully monitored** <https://bit.ly/2UhVjoy>

**Cite this article as:** Celli B, Fabbri LM. Urgent need of a management plan for survivors of COVID-19. *Eur Respir J* 2020; 55: 2000764 [<https://doi.org/10.1183/13993003.00764-2020>].

This single-page version can be shared freely online.

*To the Editor:*

Acute exacerbations of COPD (AECOPD) or “COPD crises” [1], are crucial events in the natural course of COPD. Although they can occur at any severity stage, their impact increases as patients develop more severe airflow limitation.
